# Supplementary material for: Comparison of Phytochemicals, Antioxidant, and In Vitro Anti-Alzheimer Properties of Twenty-Seven Morus spp. Cultivated in Thailand
Source: PubMed Central journal article supplement (PMC7321130; doi:10.3390/molecules25112600), 2020-06-03

## Supplementary materials

# Comparison of Phytochemicals, Antioxidant, and In Vitro Anti-Alzheimer Properties of Twenty-seven *Morus* spp. Cultivated in Thailand

Piya Temviriyankul<sup>1</sup>, Varittha Sritalahareuthai<sup>1</sup>, Kriskamol Na Jom<sup>2</sup>, Butsara Jongruaysup<sup>3</sup>, Somying Tabtimsri<sup>4</sup>, Kanchana Pruesapan<sup>5</sup>, Sirinapa Thangsiri<sup>1</sup>, Woorawee Inthachat<sup>1</sup>, Dalad Siriwan<sup>6</sup>, Somsri Charoenkiatkul<sup>1</sup> and Uthaiwan Suttisansanee<sup>1,\*</sup>

<sup>1</sup> Institute of Nutrition, Mahidol University, Salaya, Phuttamonthon, Nakhon Pathom 73170, Thailand; piya.tem@mahidol.ac.th (P.T.); varittha.sri@hotmail.com (V.S.); poo.sweet@hotmail.com (S.Th.); woorawee.int@mahidol.ac.th (W.I.); somsri.chr@mahidol.ac.th (S.C.); uthaiwan.sut@mahidol.ac.th (U.S.)

<sup>2</sup> Department of Food Science and Technology, Faculty of Agro-Industry, Kasetsart University, Chatuchak, Bangkok 10900, Thailand; kriskamol.n@ku.ac.th

<sup>3</sup> Office of Sericulture Conservation and Standard Conformity Assessment, The Queen Sirikit Department of Sericulture, Ministry of Agriculture and Cooperatives, Bangkok 10900, Thailand; butsara\_2000@hotmail.com

<sup>4</sup> The Queen Sirikit Department of Sericulture Center (Kanchanaburi), Nong Ya, Mueang Kanchanaburi District, Kanchanaburi, 71000; yodyingtts@gmail.com

<sup>5</sup> Plant Varieties Protection Office, Department of Agriculture, Ministry of Agriculture and Cooperatives, Bangkok 10900, Thailand; kpruesapan@gmail.com

<sup>6</sup> Institute of Food Research and Product Development, Kasetsart University, Chatuchak, Bangkok 10900, Thailand; dalad.s@ku.th

\* Correspondence: uthaiwan.sut@mahidol.ac.th; Tel.: +662-800-2380 ext. 422

### Supplementary Table S1:

Images of twenty-seven cultivars, sample codes, and collectors of *Morus* fruit samples used in this experiment.

| Order | Scientific name/<br>Cultivars/Sample<br>code/Collector                                  | Physical appearance                                                                  | Size<br>(cm) |
|-------|-----------------------------------------------------------------------------------------|--------------------------------------------------------------------------------------|--------------|
| 1     | <i>Morus</i> sp./ <i>Morus</i> 'Krua' /<br>KRI-2/ Somying Tabtimsri                     |    | 1.5          |
| 2     | <i>Morus</i> sp. / <i>Morus</i> 'Jak' /<br>KRI-3 / Somying<br>Tabtimsri                 |    | 1.1          |
| 3     | <i>Morus rotundiloba</i> / <i>Morus</i><br>'Pai' / KRI-4 / Somying<br>Tabtimsri         |   | 1.2          |
| 4     | <i>Morus rotundiloba</i> / <i>Morus</i><br>'Pai-Ubon' / KRI-5 /<br>Somying Tabtimsri    |  | 1.0          |
| 5     | <i>Morus rotundiloba</i> / <i>Morus</i><br>'Poe' / KRI-6 / Somying<br>Tabtimsri         |  | 1.4          |
| 6     | <i>Morus rotundiloba</i> / <i>Morus</i><br>'Mae Luke On' / KRI-7 /<br>Somying Tabtimsri |  | 1.3          |
| 7     | <i>Morus rotundiloba</i> / <i>Morus</i><br>'Som' / KRI-8 / Somying<br>Tabtimsri         |  | 0.9          |

Every *Morus* fruit samples are under the same scale (————— = 1 cm.)

### Supplementary Table S1 (Cont.):

Images of twenty-seven cultivars, sample codes, and collectors of *Morus* fruit samples used in this experiment.

| Order | Scientific name/<br>Cultivars/Sample<br>code/Collector                                       | Physical appearance                                                                  | Size<br>(cm) |
|-------|----------------------------------------------------------------------------------------------|--------------------------------------------------------------------------------------|--------------|
| 8     | <i>Morus</i> sp. / <i>Morus</i> 'Som<br>Yai' / KRI-8 / Somying<br>Tabtimsri                  |    | 1.0          |
| 9     | <i>Morus</i> sp. / <i>Morus</i> 'Sida' /<br>KRI-10 / Somying<br>Tabtimsri                    |    | 1.7          |
| 10    | <i>Morus</i> sp. / <i>Morus</i> 'Kun<br>Pai' / KRI-1 / Somying<br>Tabtimsri                  |    | 0.6          |
| 11    | <i>Morus</i> sp. / <i>Morus</i><br>'Nakhon Ratchasima 60' /<br>KRI-11 / Somying<br>Tabtimsri |  | 1.4          |
| 12    | <i>Morus</i> sp. / <i>Morus</i> 'Buri<br>Ram 51' / KRI-13 /<br>Somying Tabtimsri             |  | 1.5          |
| 13    | <i>Morus</i> sp. / <i>Morus</i> 'Buri<br>Ram 60' / KRI-12 /<br>Somying Tabtimsri             |  | 2.3          |

Every *Morus* fruit samples are under the same scale (————— = 1 cm.)

### Supplementary Table S1 (Cont.):

Images of twenty-seven cultivars, sample codes, and collectors of *Morus* fruit samples used in this experiment.

| Order | Scientific name/<br>Cultivars/Sample<br>code/Collector                                                      | Physical appearance                                                                  | Size<br>(cm) |
|-------|-------------------------------------------------------------------------------------------------------------|--------------------------------------------------------------------------------------|--------------|
| 14    | <i>Morus</i> sp. / <i>Morus</i> 'Si Sa<br>Ket 33' / KRI-14 /<br>Somying Tabtimsri                           |    | 3.1          |
| 15    | <i>Morus</i> sp. / <i>Morus</i><br>'Number 44' / KRI-19 /<br>Somying Tabtimsri                              |   | 2.2          |
| 16    | <i>Morus alba</i> L. / <i>Morus</i> sp.<br>code SKSM 820281 / KRI-<br>18 / Somying Tabtimsri                |  | 3.7          |
| 17    | <i>Morus multicaulis</i> Perr. /<br><i>Morus</i> sp. code SKSM 14-<br>13-20 / KRI-23 / Somying<br>Tabtimsri |  | 3.5          |

Every *Morus* fruit samples are under the same scale (————— = 1 cm.)

### Supplementary Table S1 (Cont.):

Images of twenty-seven cultivars, sample codes, and collectors of *Morus* fruit samples used in this experiment.

| Order | Scientific name/<br>Cultivars/Sample<br>code/Collector                                         | Physical appearance                                                                  | Size<br>(cm) |
|-------|------------------------------------------------------------------------------------------------|--------------------------------------------------------------------------------------|--------------|
| 18    | <i>Morus</i> sp. / <i>Morus</i> sp. code<br>SKSM 040691 / KRI-20 /<br>Somying Tabtimsri        |    | 1.8          |
| 19    | <i>Morus</i> sp. / <i>Morus</i> sp. code<br>SKSM 810191 / KRI-16 /<br>Somying Tabtimsri        |    | 2.4          |
| 20    | <i>Morus indica</i> L. / <i>Morus</i> sp.<br>code SKSM 810391 / KRI-<br>17 / Somying Tabtimsri |    | 1.7          |
| 21    | <i>Morus</i> sp. / <i>Morus</i> sp. code<br>SRCM 9124-12 / KRI-24 /<br>Somying Tabtimsri       |  | 3.1          |
| 22    | <i>Morus</i> sp. / <i>Morus</i> sp. code<br>SRCM 9801-465 / KRI-25 /<br>Somying Tabtimsri      |  | 2.9          |

Every *Morus* fruit samples are under the same scale (————— = 1 cm.)

### Supplementary Table S1 (Cont.):

Images of twenty-seven cultivars, sample codes, and collectors of *Morus* fruit samples used in this experiment.

| Order | Scientific name/<br>Cultivars/Sample<br>code/Collector                                    | Physical appearance                                                                  | Size<br>(cm) |
|-------|-------------------------------------------------------------------------------------------|--------------------------------------------------------------------------------------|--------------|
| 23    | <i>Morus</i> sp. / <i>Morus</i> sp. code<br>SRCM 9801-535 / KRI-26 /<br>Somying Tabtimsri |    | 1.9          |
| 24    | <i>Morus</i> sp. / <i>Morus</i> sp. code<br>SRCM 9801-833 / KRI-27 /<br>Somying Tabtimsri |    | 2.1          |
| 25    | <i>Morus</i> sp. / <i>Morus</i> sp. code<br>SRCM 9806-271 / KRI-28 /<br>Somying Tabtimsri |  | 2.3          |
| 26    | <i>Morus</i> sp. / <i>Morus</i> sp. code<br>SRCM 9806-287 / KRI-29 /<br>Somying Tabtimsri |  | 2.9          |
| 27    | <i>Morus</i> sp. / <i>Morus</i> sp. code<br>SRCM 9809-34 / KRI-30 /<br>Somying Tabtimsri  |  | 2.4          |

Every *Morus* fruit samples are under the same scale (————— = 1 cm.)

### Supplementary Table S2:

Color (where L describes darkness (-) to lightness (+), a describes green (-) to red (+) colors, and b describes indigo (-) to yellow (+) colors) and the percentage (%) of moisture content of fresh and freeze-dried *Morus* fruit samples

| Order | Cultivars                           | <sup>s</sup> Color of fresh samples |              |              | <sup>s</sup> Color of dried samples |             |             | Moisture content (%) of fresh sample | Moisture content (%) of dried sample |
|-------|-------------------------------------|-------------------------------------|--------------|--------------|-------------------------------------|-------------|-------------|--------------------------------------|--------------------------------------|
|       |                                     | L                                   | a            | b            | L                                   | a           | b           |                                      |                                      |
| 1     | <i>Morus</i> 'Krua'                 | 27.35 ± 1.52                        | 14.12 ± 1.16 | 17.12 ± 1.05 | 19.96 ± 0.02                        | 7.73 ± 0.02 | 5.78 ± 0.03 | 79.33                                | 6.57                                 |
| 2     | <i>Morus</i> 'Jak'                  | 25.35 ± 1.01                        | 17.40 ± 0.57 | 15.49 ± 0.89 | 21.89 ± 0.02                        | 5.97 ± 0.04 | 7.70 ± 0.01 | 82.11                                | 5.48                                 |
| 3     | <i>Morus</i> 'Pai'                  | 24.20 ± 1.05                        | 14.16 ± 2.35 | 14.64 ± 0.83 | 21.22 ± 0.06                        | 4.98 ± 0.03 | 7.34 ± 0.07 | 77.08                                | 5.85                                 |
| 4     | <i>Morus</i> 'Pai-Ubon'             | 21.84 ± 0.77                        | 17.52 ± 0.77 | 13.57 ± 0.89 | 22.85 ± 0.03                        | 5.71 ± 0.01 | 7.76 ± 0.02 | 81.53                                | 6.45                                 |
| 5     | <i>Morus</i> 'Poe'                  | 20.60 ± 2.71                        | 16.72 ± 1.99 | 11.22 ± 1.87 | 19.93 ± 0.06                        | 6.45 ± 0.01 | 5.66 ± 0.03 | 80.43                                | 7.20                                 |
| 6     | <i>Morus</i> 'Mae Luke On'          | 23.41 ± 0.72                        | 15.15 ± 0.10 | 13.32 ± 0.51 | 21.09 ± 0.03                        | 4.54 ± 0.03 | 7.32 ± 0.02 | 79.24                                | 7.00                                 |
| 7     | <i>Morus</i> 'Som'                  | 26.58 ± 1.31                        | 18.63 ± 0.87 | 16.06 ± 0.89 | 22.29 ± 0.01                        | 5.95 ± 0.01 | 7.89 ± 0.02 | 77.92                                | 5.49                                 |
| 8     | <i>Morus</i> 'Som Yai'              | 23.48 ± 2.52                        | 17.08 ± 2.33 | 13.79 ± 1.55 | 21.53 ± 0.02                        | 6.40 ± 0.02 | 7.19 ± 0.02 | 79.30                                | 6.15                                 |
| 9     | <i>Morus</i> 'Sida'                 | 24.96 ± 1.21                        | 15.20 ± 1.16 | 16.01 ± 0.80 | 20.54 ± 0.04                        | 7.14 ± 0.02 | 6.24 ± 0.03 | 80.69                                | 4.09                                 |
| 10    | <i>Morus</i> 'Kun Pai'              | 13.47 ± 1.45                        | 5.44 ± 0.19  | 2.08 ± 0.50  | 21.90 ± 0.03                        | 4.34 ± 0.03 | 1.00 ± 0.01 | 81.19                                | 7.83                                 |
| 11    | <i>Morus</i> 'Nakhon Ratchasima 60' | 29.14 ± 1.88                        | 17.79 ± 0.86 | 16.95 ± 1.00 | 24.73 ± 0.02                        | 5.86 ± 0.02 | 7.77 ± 0.03 | 80.85                                | 8.02                                 |
| 12    | <i>Morus</i> 'Buri Ram 51'          | 23.35 ± 1.99                        | 18.44 ± 0.10 | 13.86 ± 1.88 | 20.98 ± 0.04                        | 6.36 ± 0.03 | 7.11 ± 0.03 | 86.22                                | 6.66                                 |
| 13    | <i>Morus</i> 'Buri Ram 60'          | 19.20 ± 1.09                        | 21.49 ± 1.49 | 10.90 ± 0.68 | 26.21 ± 0.02                        | 5.82 ± 0.01 | 5.48 ± 0.01 | 85.94                                | 9.67                                 |
| 14    | <i>Morus</i> 'Si Sa Ket 33'         | 21.55 ± 1.36                        | 21.89 ± 2.73 | 13.65 ± 0.95 | 21.48 ± 0.05                        | 7.44 ± 0.02 | 6.22 ± 0.02 | 83.19                                | 9.02                                 |

**Supplementary Table S2 (Cont.):**

Color (where L describes darkness (-) to lightness (+), a describes green (-) to red (+) colors, and b describes indigo (-) to yellow (+) colors) and the percentage (%) of moisture content of fresh and freeze-dried *Morus* fruit samples

| Order | Cultivars                           | <sup>s</sup> Color of fresh samples |              |              | <sup>s</sup> Color of dried samples |             |             | Moisture content (%) of fresh sample | Moisture content (%) of dried sample |
|-------|-------------------------------------|-------------------------------------|--------------|--------------|-------------------------------------|-------------|-------------|--------------------------------------|--------------------------------------|
|       |                                     | L                                   | a            | b            | L                                   | a           | b           |                                      |                                      |
| 15    | <i>Morus</i> 'Number 44'            | 21.24 ± 4.45                        | 17.39 ± 1.54 | 12.58 ± 2.59 | 21.33 ± 0.02                        | 7.06 ± 0.02 | 4.66 ± 0.03 | 85.94                                | 3.14                                 |
| 16    | <i>Morus</i> sp. code SKSM 820281   | 13.09 ± 1.36                        | 11.87 ± 0.44 | 4.14 ± 0.40  | 21.83 ± 0.03                        | 4.73 ± 0.03 | 1.43 ± 0.02 | 86.08                                | 8.35                                 |
| 17    | <i>Morus</i> sp. code SKSM 14-13-20 | 13.97 ± 1.21                        | 3.50 ± 0.50  | 0.83 ± 0.17  | 21.37 ± 0.06                        | 3.31 ± 0.03 | 0.41 ± 0.01 | 85.80                                | 9.76                                 |
| 18    | <i>Morus</i> sp. code SKSM 040691   | 28.5 ± 5.58                         | 14.36 ± 1.64 | 15.43 ± 3.50 | 22.90 ± 0.01                        | 4.74 ± 0.03 | 7.61 ± 0.02 | 92.34                                | 4.48                                 |
| 19    | <i>Morus</i> sp. code SKSM 810191   | 9.73 ± 0.06                         | 6.81 ± 0.27  | 4.80 ± 0.21  | 21.96 ± 0.02                        | 6.17 ± 0.07 | 0.92 ± 0.02 | 84.32                                | 7.15                                 |
| 20    | <i>Morus</i> sp. code SKSM 810391   | 17.13 ± 0.33                        | 10.79 ± 0.87 | 5.05 ± 0.42  | 21.42 ± 0.03                        | 4.52 ± 0.03 | 0.67 ± 0.04 | 85.08                                | 8.02                                 |
| 21    | <i>Morus</i> sp. code SRCM 9124-12  | 25.13 ± 2.31                        | 16.63 ± 2.20 | 15.00 ± 1.26 | 21.28 ± 0.02                        | 4.83 ± 0.03 | 7.53 ± 0.03 | 83.37                                | 6.02                                 |
| 22    | <i>Morus</i> sp. code SRCM 9801-465 | 9.00 ± 1.00                         | 1.00 ± 0.03  | 0.64 ± 0.05  | 23.22 ± 0.04                        | 2.50 ± 0.03 | 2.46 ± 0.02 | 84.27                                | 7.83                                 |
| 23    | <i>Morus</i> sp. code SRCM 9801-535 | 26.25 ± 2.39                        | 18.55 ± 1.64 | 16.57 ± 1.88 | 23.69 ± 0.05                        | 4.12 ± 0.01 | 8.40 ± 0.02 | 85.43                                | 8.83                                 |
| 24    | <i>Morus</i> sp. code SRCM 9801-833 | 23.96 ± 4.29                        | 15.49 ± 2.08 | 13.37 ± 2.89 | 22.89 ± 0.03                        | 4.35 ± 0.01 | 6.53 ± 0.01 | 84.28                                | 10.46                                |
| 25    | <i>Morus</i> sp. code SRCM 9806-271 | 21.03 ± 1.83                        | 14.32 ± 1.71 | 11.24 ± 1.86 | 17.23 ± 0.05                        | 7.94 ± 0.03 | 3.95 ± 0.05 | 81.14                                | 5.01                                 |
| 26    | <i>Morus</i> sp. code SRCM 9806-287 | 23.67 ± 1.43                        | 18.36 ± 3.17 | 13.79 ± 1.05 | 20.80 ± 0.03                        | 8.53 ± 0.02 | 5.35 ± 0.04 | 85.33                                | 9.93                                 |
| 27    | <i>Morus</i> sp. code SRCM 9809-34  | 21.65 ± 0.82                        | 15.31 ± 1.70 | 13.27 ± 0.69 | 22.36 ± 0.02                        | 3.95 ± 0.01 | 7.92 ± 0.05 | 85.78                                | 9.63                                 |



## Supplementary Figure S1:

High-performance liquid chromatography (HPLC) chromatograms of (A.) cyanidin chloride standard, and anthocyanidin analyses of *Morus* fruit extracts including (B.) *Morus* 'Krua', (C.) *Morus* 'Jak', (D.) *Morus* 'Pai', (E.) *Morus* 'Pai-Ubon', (F.) *Morus* 'Poe', (G.) *Morus* 'Mae Luke On', (H.) *Morus* 'Som', (I.) *Morus* 'Som Yai', (J.) *Morus* 'Sida', (K.) *Morus* 'Kun Pai', (L.) *Morus* 'Nakhon Ratchasima 60', (M.) *Morus* 'Buri Ram 51', (N.) *Morus* 'Buri Ram 60', (O.) *Morus* 'Si Sa Ket 33', (P.) *Morus* 'Number 44', (Q.) *Morus* sp. code SKSM 820281, (R.) *Morus* sp. code SKSM 14-13-20, (S.) *Morus* sp. code SKSM 040691, (T.) *Morus* sp. code SKSM 810191', (U.) *Morus* sp. code SKSM 810391, (V.) *Morus* sp. code SRCM 9124-12, (W.) *Morus* sp. code SRCM 9801-465, (X.) *Morus* sp. code SRCM 9801-535, (Y.) *Morus* sp. code SRCM 9801-833, (Z.) *Morus* sp. code SRCM 9806-271, (AA.) *Morus* sp. code SRCM 9806-287, and (AB.) *Morus* sp. code SRCM 9809-34. The retention times ( $R_t$ ) of cyanidin chloride in *Morus* fruit extracts were also indicated.

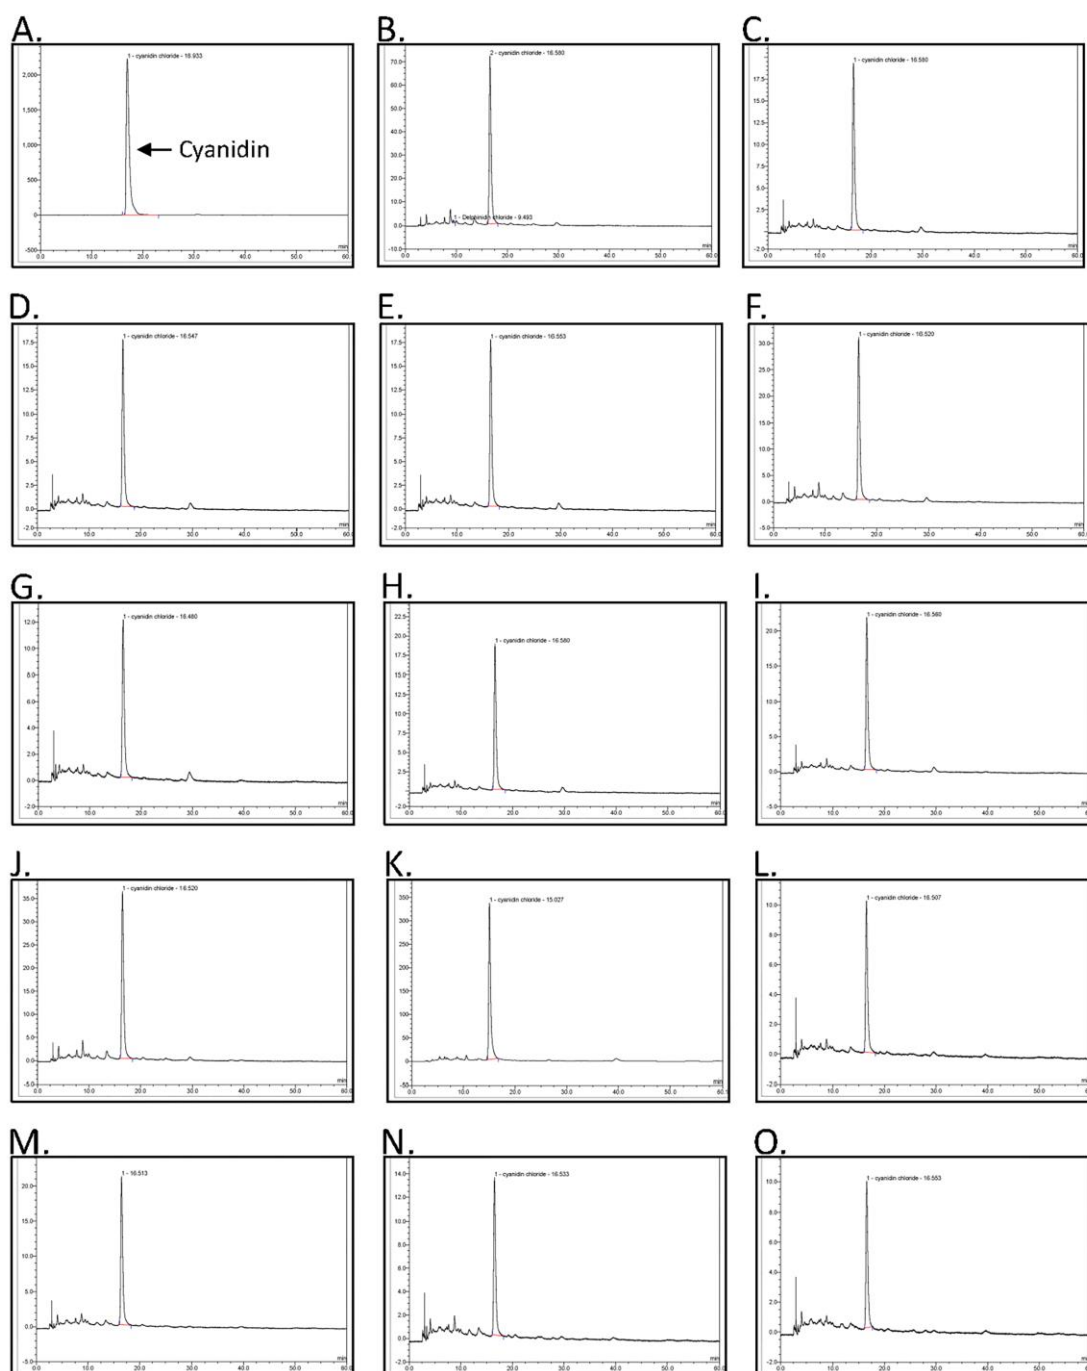

## Supplementary Figure S1 (Cont.):

High-performance liquid chromatography (HPLC) chromatograms of (A.) cyanidin chloride standard, and anthocyanidin analyses of *Morus* fruit extracts including (B.) *Morus* 'Krua', (C.) *Morus* 'Jak', (D.) *Morus* 'Pai', (E.) *Morus* 'Pai-Ubon', (F.) *Morus* 'Poe', (G.) *Morus* 'Mae Luke On', (H.) *Morus* 'Som', (I.) *Morus* 'Som Yai', (J.) *Morus* 'Sida', (K.) *Morus* 'Kun Pai', (L.) *Morus* 'Nakhon Ratchasima 60', (M.) *Morus* 'Buri Ram 51', (N.) *Morus* 'Buri Ram 60', (O.) *Morus* 'Si Sa Ket 33', (P.) *Morus* 'Number 44', (Q.) *Morus* sp. code SKSM 820281, (R.) *Morus* sp. code SKSM 14-13-20, (S.) *Morus* sp. code SKSM 040691, (T.) *Morus* sp. code SKSM 810191', (U.) *Morus* sp. code SKSM 810391, (V.) *Morus* sp. code SRCM 9124-12, (W.) *Morus* sp. code SRCM 9801-465, (X.) *Morus* sp. code SRCM 9801-535, (Y.) *Morus* sp. code SRCM 9801-833, (Z.) *Morus* sp. code SRCM 9806-271, (AA.) *Morus* sp. code SRCM 9806-287, and (AB.) *Morus* sp. code SRCM 9809-34. The retention times ( $R_t$ ) of cyanidin chloride in *Morus* fruit extracts were also indicated.

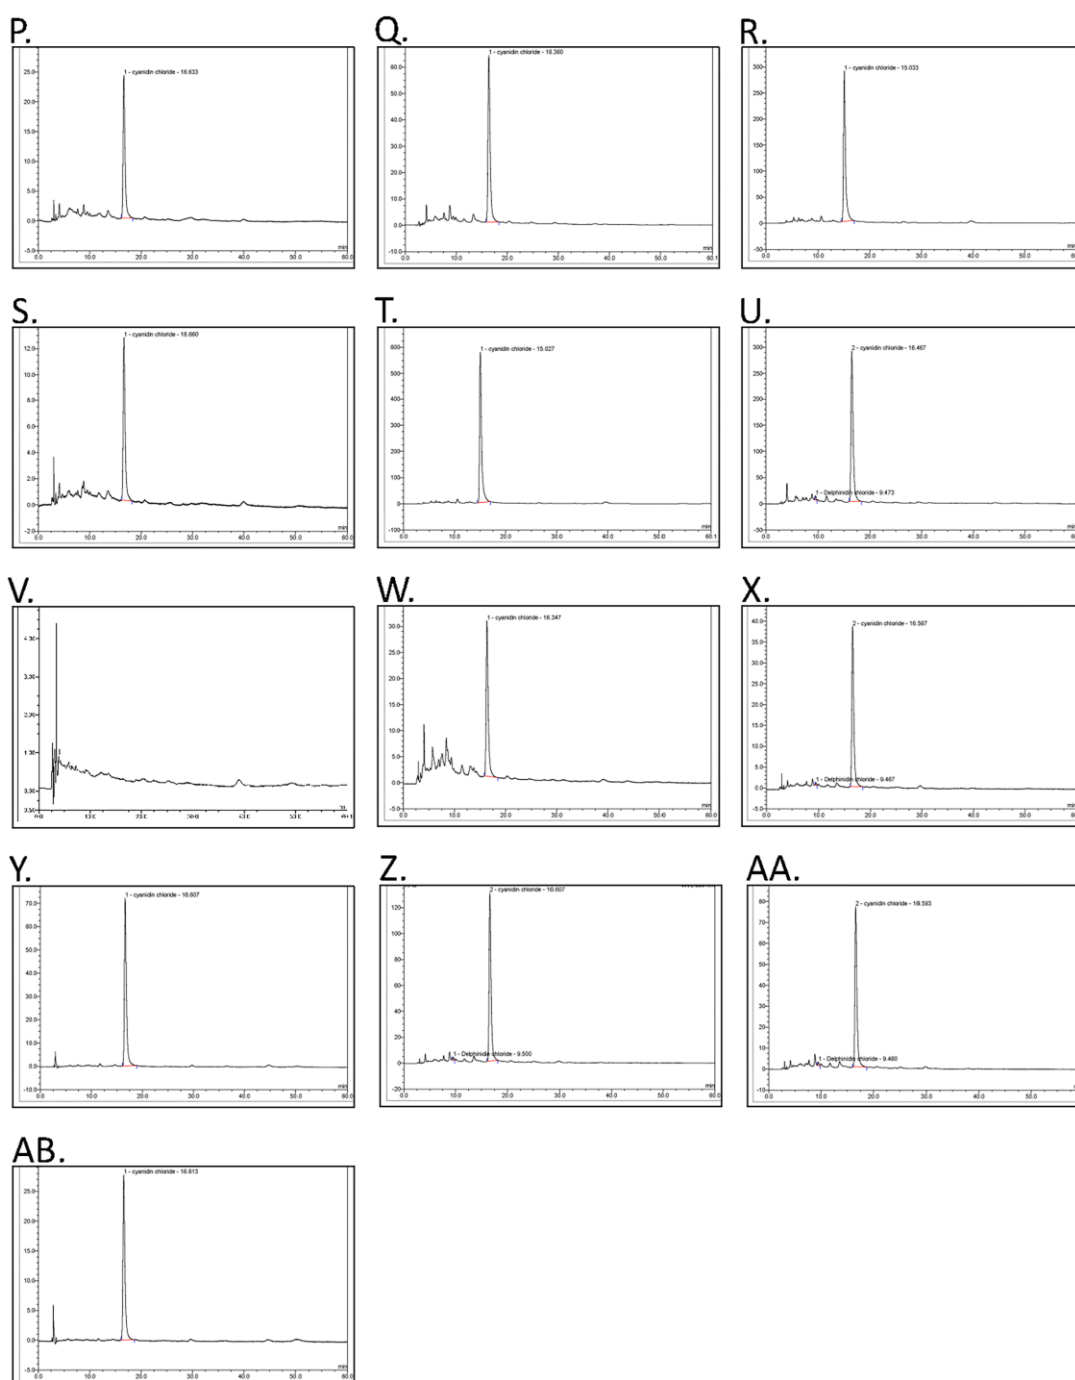

## Supplementary Figure S2:

High-performance liquid chromatography (HPLC) chromatograms of (A.) kuromanin and keracyanin standards, and anthocyanin analyses of *Morus* fruit extracts including (B.) *Morus* 'Krua', (C.) *Morus* 'Jak', (D.) *Morus* 'Pai', (E.) *Morus* 'Pai-Ubon', (F.) *Morus* 'Poe', (G.) *Morus* 'Mae Luke On', (H.) *Morus* 'Som', (I.) *Morus* 'Som Yai', (J.) *Morus* 'Sida', (K.) *Morus* 'Kun Pai', (L.) *Morus* 'Nakhon Ratchasima 60', (M.) *Morus* 'Buri Ram 51', (N.) *Morus* 'Buri Ram 60', (O.) *Morus* 'Si Sa Ket 33', (P.) *Morus* 'Number 44', (Q.) *Morus* sp. code SKSM 820281, (R.) *Morus* sp. code SKSM 14-13-20, (S.) *Morus* sp. code SKSM 040691, (T.) *Morus* sp. code SKSM 810191', (U.) *Morus* sp. code SKSM 810391, (V.) *Morus* sp. code SRCM 9124-12, (W.) *Morus* sp. code SRCM 9801-465, (X.) *Morus* sp. code SRCM 9801-535, (Y.) *Morus* sp. code SRCM 9801-833, (Z.) *Morus* sp. code SRCM 9806-271, (AA.) *Morus* sp. code SRCM 9806-287, and (AB.) *Morus* sp. code SRCM 9809-34. The retention times ( $R_t$ ) of kuromanin and keracyanin in *Morus* fruit extracts were also indicated.

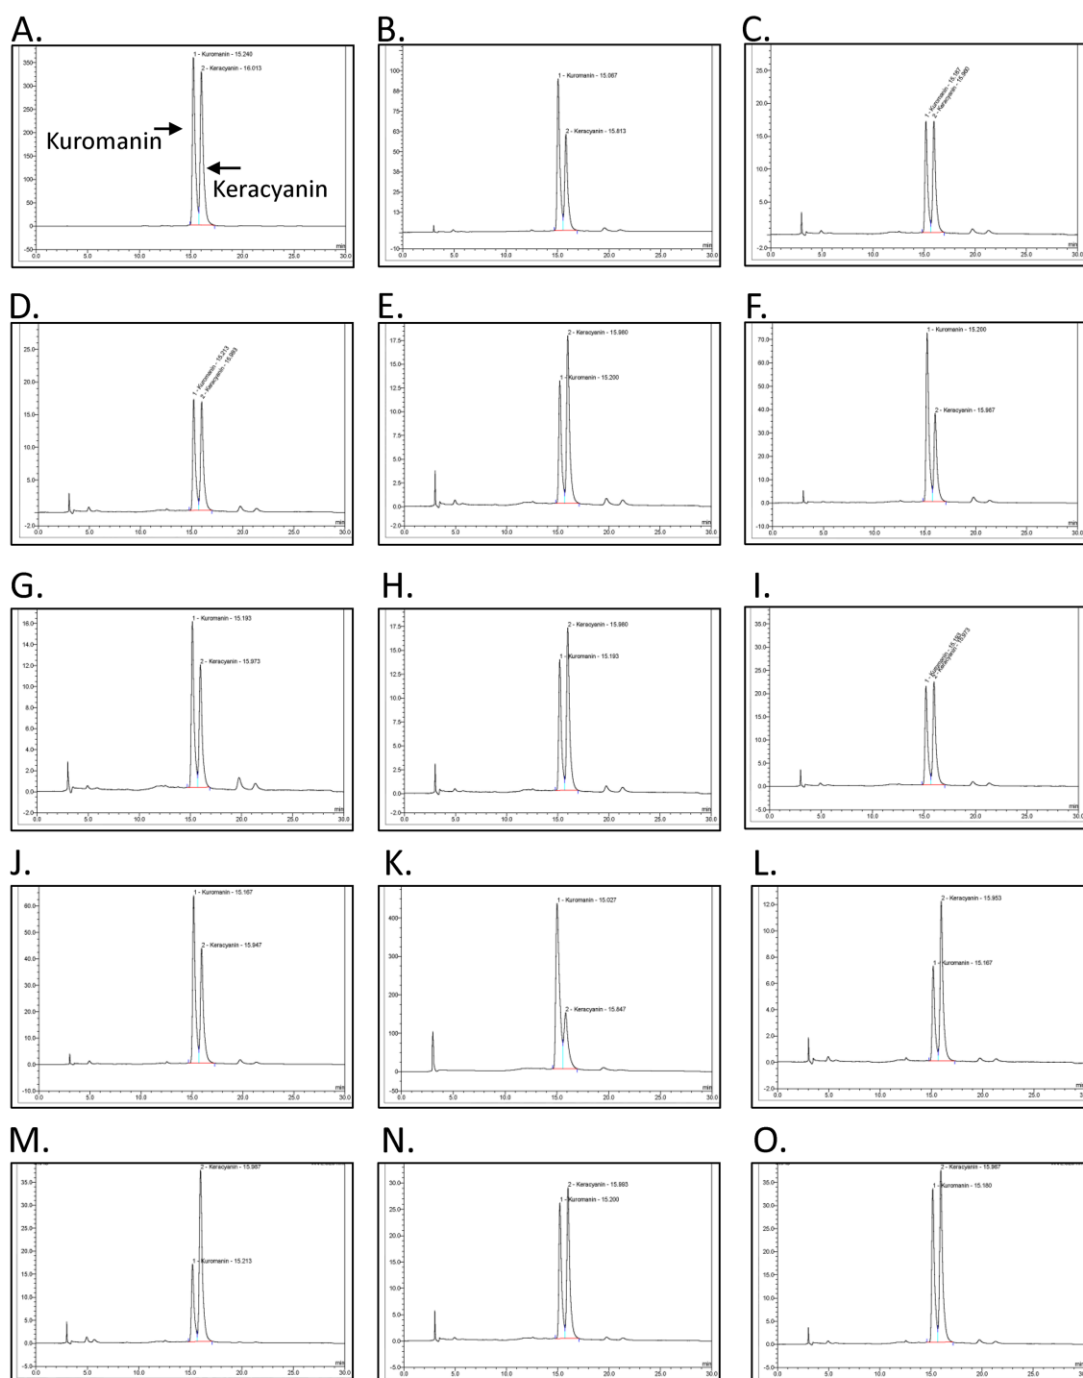

## Supplementary Figure S2 (Cont.):

High-performance liquid chromatography (HPLC) chromatograms of (A.) kuromanin and keracyanin standards, and anthocyanin analyses of *Morus* fruit extracts including (B.) *Morus* 'Krua', (C.) *Morus* 'Jak', (D.) *Morus* 'Pai', (E.) *Morus* 'Pai-Ubon', (F.) *Morus* 'Poe', (G.) *Morus* 'Mae Luke On', (H.) *Morus* 'Som', (I.) *Morus* 'Som Yai', (J.) *Morus* 'Sida', (K.) *Morus* 'Kun Pai', (L.) *Morus* 'Nakhon Ratchasima 60', (M.) *Morus* 'Buri Ram 51', (N.) *Morus* 'Buri Ram 60', (O.) *Morus* 'Si Sa Ket 33', (P.) *Morus* 'Number 44', (Q.) *Morus* sp. code SKSM 820281, (R.) *Morus* sp. code SKSM 14-13-20, (S.) *Morus* sp. code SKSM 040691, (T.) *Morus* sp. code SKSM 810191', (U.) *Morus* sp. code SKSM 810391, (V.) *Morus* sp. code SRCM 9124-12, (W.) *Morus* sp. code SRCM 9801-465, (X.) *Morus* sp. code SRCM 9801-535, (Y.) *Morus* sp. code SRCM 9801-833, (Z.) *Morus* sp. code SRCM 9806-271, (AA.) *Morus* sp. code SRCM 9806-287, and (AB.) *Morus* sp. code SRCM 9809-34. The retention times ( $R_t$ ) of kuromanin and keracyanin in *Morus* fruit extracts were also indicated.

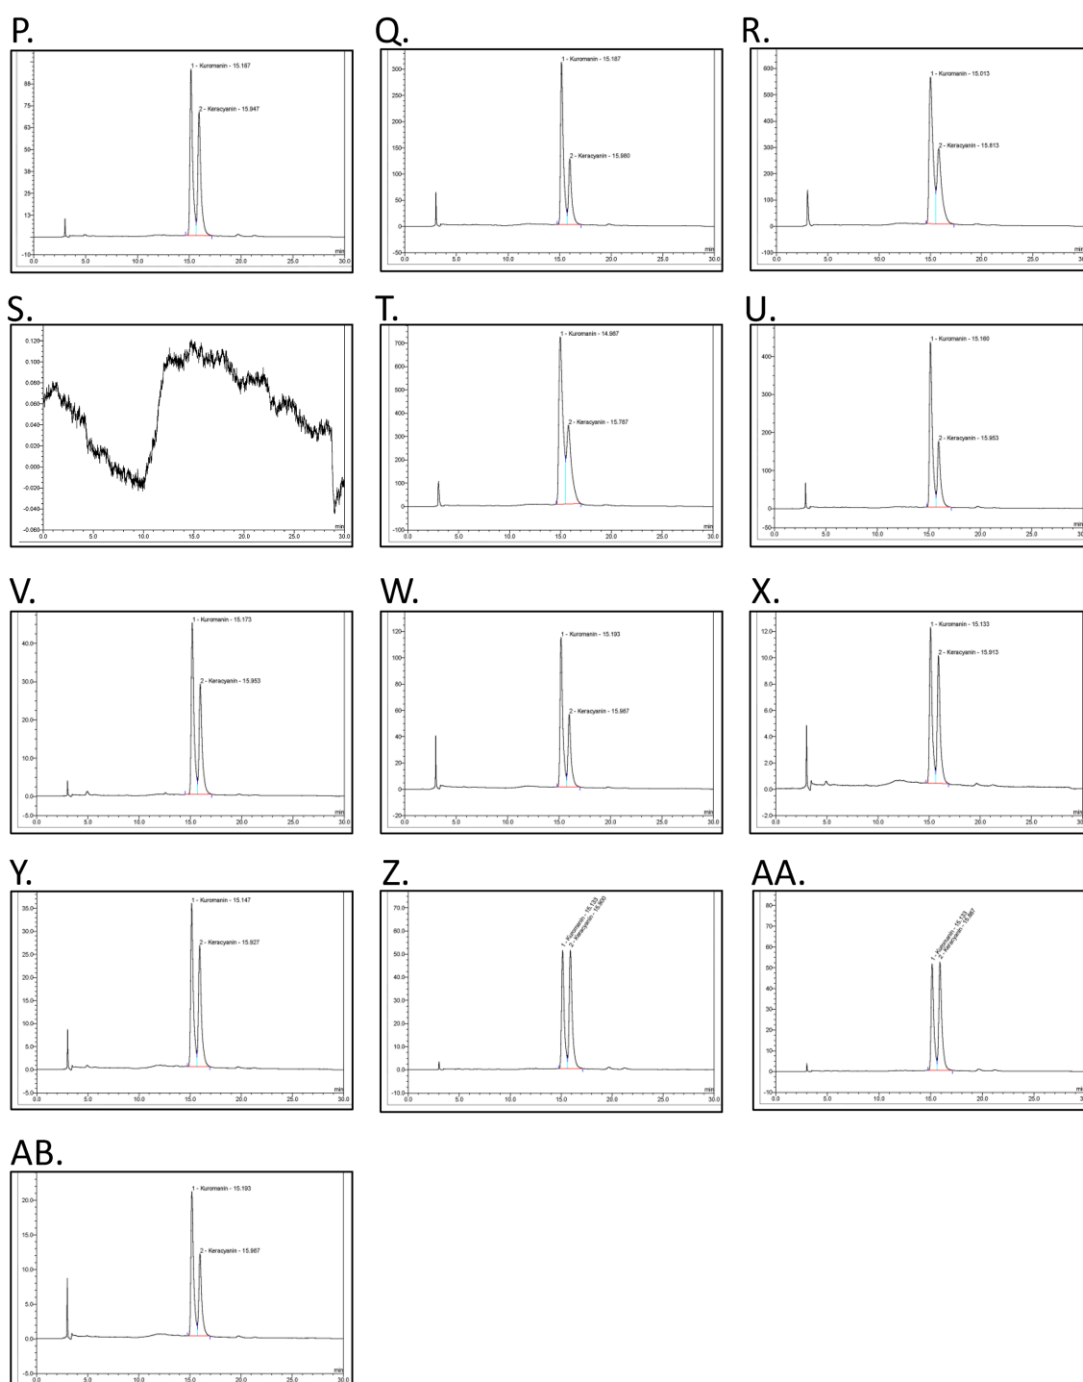

Supplement: molecules-25-02600-s001.pdf [file molecules-25-02600-s001.pdf]
